# Supplementary material for: Molecular Characterization of Novel Mycoviruses in Seven Umbelopsis Strains
Source: MDPI journal article supplement (doi:10.3390/v14112343), 2022-10-25
Supplement: s1 [file s1]

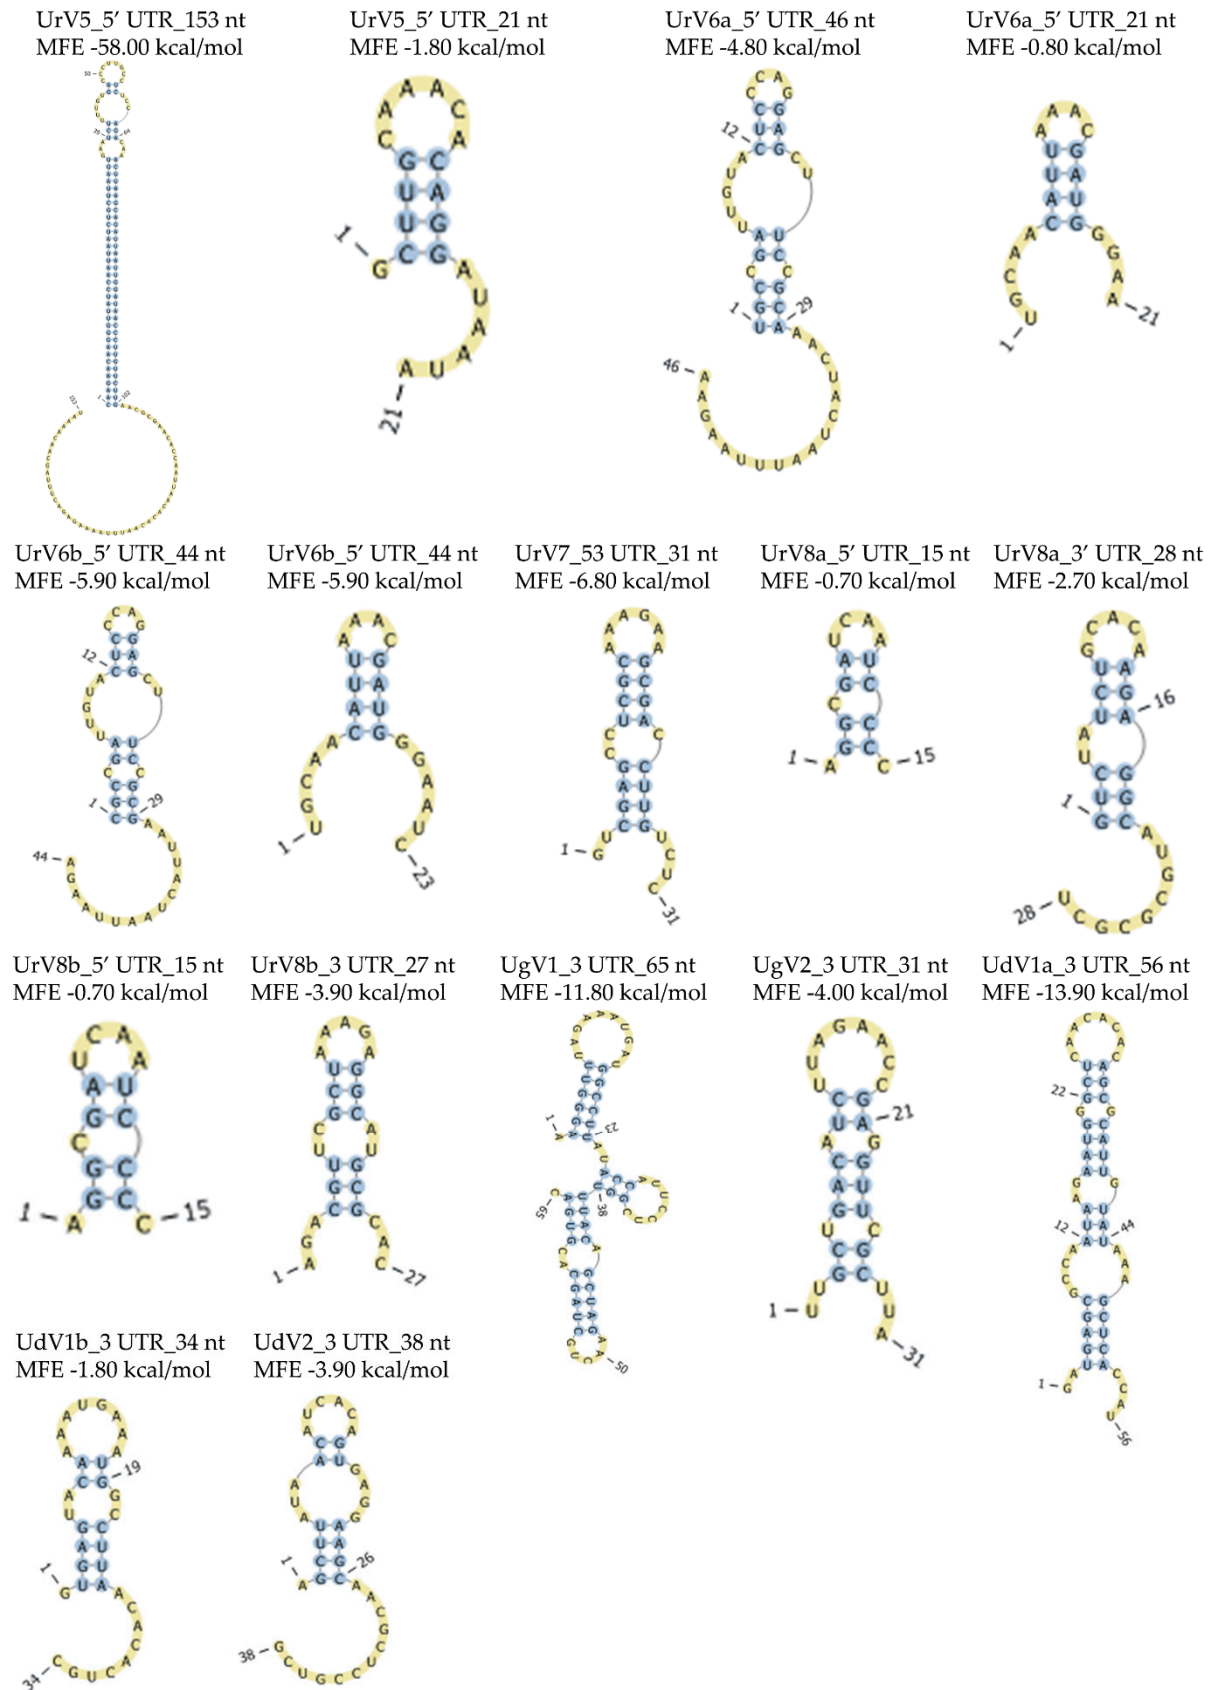

**Supplementary Figure S1.** The predicted secondary structures of the 5' and 3' UTRs of the detected viruses.

UrV5, Umbelopsis ramanniana virus 5; UrV6a, Umbelopsis ramanniana virus 6a; UrV6b, Umbelopsis ramanniana virus 6b; UrV7, Umbelopsis ramanniana virus 7; Ur8a, Umbelopsis ramanniana virus 8a; UrV8b, Umbelopsis ramanniana virus 8b; UgV1, Umbelopsis gibberispora virus 1; UgV2, Umbelopsis gibberispora virus 2; UdV1a,

Umbelopsis dimorpha virus 1a; UdV1b, Umbelopsis dimorpha virus 1b; UdV2, Umbelopsis dimorpha virus 2; UdV2; UTR, Untranslated region; MFE, minimum free energy.
