# Supplementary material for: Molecular Characterization of Novel Mycoviruses in Seven Umbelopsis Strains
Source: MDPI journal article supplement (doi:10.3390/v14112343), 2022-10-25
Supplement: s1 [file s1]

>Umbelopsis gibberispora CBS 109328 - 631 nt

tcaaggtggctcagggacgtgccgcaggttcggcctcgagaggaggatttttggatgggcacaaagag  
ggctgggctgagggccatccagtgtgagtgacctgacgtgagctgcggcgaggctaaggccaggctccagc  
atgtcaactaccacaaactactacgcacggtaggacagccaggaacagcctgtctgaaacggttgagaagc  
atcgactgtcaaggtgaagaatgagtgatggtttcttggctgggtggcgcccaagcaccagttgctag  
aacactttggcaagcaggctcacattggttgaccacaaaggccggtaaagccgtggccactgagctagctc  
tcagacatgtggcaccactggattggcaacgcgccatagggagttggggcaggccacgttctgcgcgagcg  
gtgatagccaggtaggggctcctgcttgacctgcctgggtctgcagacatgtggtacgcaatggttggccg  
tcgccgggcatgggtccagcatgtatgccggacttggtgggaggtgaacaacaactaaagggttggcggtg  
gaaatgccactgccattatgcaccgattggtgcacaacaaaacgaagggatttcgtttccccc

>Umbelopsis versiformis CBS 473.74 - 1069 nt

tatgcagttgagtgccgcagagtgaggacgaaacagtcaatatccgccaccatcgtaaacgacaatatggggacgaa  
gacgcaatacaaaaacaaacggcaccctaattgtctggctggcggtttaacaacctacatgaactcaattctcaatta  
catatacacgaactattgaccaaggatacagaaagcacctaccaatcggtacacaacgggtgatgatgtactgctc  
ggggtcagaaacttcgatatagcgaggagggtgtatattaatgcggataagtacaatgtccggtttgcaacgcagc  
aatgacaggttcgggggtatagcgaatttctgctggttgaccgcgttcgaggtgatttcggtcagtatctgtca  
aggaagtagcaacggttaattgcatgccagaatagagtgccaagctagccctaagcgtagtggaacttggctcagggca  
tctgaagaacggttgcgtgaattcatcacagcgaggtggtcacctaagactgcggccaggttgaggagtatcgcg  
tatgacagatatccaagatttatgaaacggacacagccactctctaccgtatcaaatattctcaccgtgtagca  
gggggaatatctgatggcctcgagacactattgatcaggtgataaataaggatcaagtcgggcggatagcggag  
ctaccggactatctgccaggcatagcagactattcaaacgtgctcaagaagagtttaaatgtgaatatggaagta  
agtaaaatagcaaaacggatatacagcgccacactaaatgctgttaagttagaaaggactaaggttcacaccgag  
gtcccagagaacatagaacaactgaaagtgtacagagctttgtataaagctcacagcgatgcaactgataatgct  
gcatttggaaaggcgatttctaacaggatttcgtatttgacgtgctcagtcgtaatgacaaggcgaacacgttgatg  
ggcatcttgtaccaatcgaaggacccgatgcaattgttaaaagtaatagcatgagtggtgctgcgccacaaaaata  
gcgcacctgtcacacgtca

>Umbelopsis angularis CBS 603.68 - 3847 nt

tgaaaatttacgcgaatctacctgctgtaagggtttttcaacttataatttcgtccaactctgtgtacaactta  
tgataagcattcaaagcagtggtcgtcatacgtataaatccgtatgcctgctgttcccaataaacataactctac  
aacaagcatgatcaaatcaggtagcttaccacagacaagtcacacatttgttgaccaccttgtgattagtga  
aagtgaagaaggattattataagaccttatattgaggctcagacccatgtacatctgccatattgttaaaaaaccag  
acatatggcagataattaaatctgccatattaactgagctgaatatcgacattcagaagttgtacgatgatgacg  
ctgagttactactaaaagtttgctacgaagtgttgctatcgagttgcggattaatgtcagaccgatgggattact  
ataacattaaatctccattcgtattaggagtgcaaaaatgtcttctcgatgtattgggaataactttagttactc  
tatacttgacagctgcgtgcaagtgccggaggattaatccgccgtcgggaagtagagccgacattgttcaag  
gagtcagcaacgataaagaagtaacttgcttgttaagtataagtgccgacgtggtaatcaagttggagtcagcac  
tagccgctatacacaggcgtagtggttgtaataacagttgtcttggtggacagttgaatggtagtttattgcta  
gtagacgtatgtctggttttagtagattcttggaggaaaggctccgaaccacaacgaacgaagtttggtatggtg  
tccacactcagagtcgaagctgaaaatactctgtacgatgcacttactgcattgggtttatctcattttaaaacgc  
caggatcaaacggttatattgcctaagggcggttggtactgaggacctctgtaaatgtaatagtcgtagtgtcag  
aattagtgacagctcagcaagtggttccgcaatgagatcatttgcggaggaaggcgataaacatgccaggacat  
ctactatgttatttgttttgacgttatattgctcatcgtcttaggtccgccattagcagtaggactcgtcccca  
agcttcagtaaaatcacatatagacccttcttctctgttcgatgtattgggaataactttagttactc  
acggttggctctaacaagttgtccattgacccgctggaagcagtggtcgaatcagtaagacatagagatttctac  
gagcgaagcgttaattggcggttaattctgtgtccttcagggtattaattatagcggagacaaggccatacgtctagct  
gtaccgctcttagattgggtcgcgattgggttatatagcaaatccaaattgaggacgcggacggtgtctcaattata  
atgcaacacgtcggcgccggccacagttggaaaaattctggcacgatggctatgtgtgccactcagcgtgac  
gatgtcacagtcocagtttagtaagataccagctagctctgacaagcttacaggtgacgttaattacctcattaccg  
ggtgtttacttaggttacgaccccagagatgaagtcaaagctaaaaaatttatcacgcgcgagttctaaaacct  
cagctagggtttcacatggaagatggcgctccaggggagatcatgatcgtgtgattgatcgtgtgtttactgcaaag  
ctgttccaagatgaggtgcctctatcacctagctttaacgcgcaagagaggcctaataccatagaaagatcacct  
tcacgcattagtgatagcccactcacaacgtgcaactccaagactagtgatagtgaaccatgcctgagtcacgc  
tacgtttggctcgggttgtagcgcgtatggaagaacatcttacggcacttgtatcgacaacgaccatgaatgggta  
aatgatgctgacttcattggaagaggcagcactgaaatcaatattgcaatagcagaactcgggtacagttgtcaa  
gatactaccagtatctatgtatgtaaaacatgtacaacatataaaatgattagaagtagtctagacgctcagaga  
caggaagatatgacatcttttcagaagctctacaccaaagcaagaagtggtgtacgagacacaacatccaggtgcat

ataaagcatcatgaccggtttccacagtctgtgtaatgggtgttgcgatgtgcgactcgtgcggtataaagaaaaca  
gggtgttatctgtgtggatcgggaattgatccagcaagaaagagaattagcactcaagtatgctgagtcggataca  
gactccgatgcgtatagcgtcatgagtgatggatgatatgtgatcatagtgaggaccactgtacggatgaaaca  
atacagcaagtttctgtcagaaaaataactaacgagcctgaagatctagatttcggcgaatttaatagggaacac  
gacactacctacccccagaccactaacgaagacctgacactatgcgagactctagagttgttgtatgatttaagt  
gatgacttttgctcaggcagcagttttacatgcaattgtgaacctcggagtaactaaaaatcatttcagctctgaa  
gtgggttgaggaggtattattagcagcgggcataagcttttcgatatgtagatatattaaagggaggactataagc  
ttacgagacatcaacatcaatatccgcaaagctgttgaaatgaagctcgaacatatagattttgatgggtgctatc  
gacagatgtaagcgagaagcagagatgagcagtcaggcgatatcaagggaagaccaaaaatttgataataagctta  
tgttttaaggaagcctccccattaggaacacatatagttaagggtaaacttagtaatgatatggttgagtgatgaa  
gtaaccccaaataagttgatcagcgagatgggtctcaattctagctgttggaacatcaagctgagtaaaaaagaag  
attgctagagctgggaagagggcggaagaacacgtaaaatattagtaactgcggttgatatttatgctgatatcgca  
atccagcgattactgggtgtgcttcagcctgagcacgtggggatgatcagtatgaggtaaagacggtagtgaaa  
tttaaggatctgataacgaaacttgcgcgtaggttttcagtagaggaaaaggatattattttacgatatgtact  
actatatctagctacaggtgcaatgtggctctgtataagcagtggtgggaaatcgagaagttcagagcgtatggta  
gcaaaaagtaggaagagagagaatatattgtattcgataggtccgttgcgaaatttcacacagaacggagtaagtaat  
gctatgattgaaaaacctcataaagggttatgtaaagtcaagttttggaaaaaaataactgaaactagaaatcgggt  
aggtggctaggggttgatgcaagaggttaggaataagagactagccgggcaatgtgaaaaacagctaaaactcgca  
aaggctatgatcacaacttctagatatatatcactggacatatagaaatggcgccacccccggctggaaataggg  
gttagggcgcaatagacacgacacaaaatgttcaagggttatgcattctctgggcgactcaatgcgagttcacagcc  
cagacagtgtagtgaggaaagtcacacgggaagcatgctgtttagccagtggtgcgagccggaagggttaaaata  
gagcaggatcccgggaattcgg
