# Supplementary material for: Molecular Characterization of Novel Mycoviruses in Seven Umbelopsis Strains
Source: MDPI journal article supplement (doi:10.3390/v14112343), 2022-10-25
Supplement: s1 [file s1]

**Supplementary Table S3.** Amino acid sequence identities of the UrV5 CP, UrV5 RdRp, UrV6a CP, UrV6a RdRp, UrV7 CP, UrV7 RdRp, UrV8a CP, UrV8a RdRp, UrV6b CP, UrV6b RdRp, UgV1 CP, UgV1 RdRp, UgV2 CP, UgV2 RdRp, UgV8b CP, UgV8b RdRp, UdV1a CP, UdV1b RdRp, UdV2 CP, UdV2 RdRp and UdV1b CP, UdV1b RdRp with the most similar sequences deduced by the BLAST search of the NCBI database.

| <b>Virus</b>      | <b>Virus name</b>                              | <b>Accession number</b> | <b>Identity (%)</b> | <b>E-Value</b> | <b>Query Coverage (%)</b> |
|-------------------|------------------------------------------------|-------------------------|---------------------|----------------|---------------------------|
| <b>UrV5 CP</b>    | Totiviridae sp.<br>H4Bulk46262_000002 HP       | QDH90455.1              | 29,47               | 5e-107         | 98                        |
|                   | Totiviridae sp.<br>H1Rhizo26FD511_000002 HP    | QDH86838.1              | 33,28               | 8e-84          | 67                        |
|                   | Totiviridae sp.<br>H4Bulk46501_000002 HP       | QDH87366.1              | 31,56               | 5e-65          | 54                        |
|                   | Totiviridae sp.<br>H1BulkLitter51292_000002 HP | QDH87753.1              | 28,73               | 1e-16          | 40                        |
|                   | Erysiphales associated totivirus<br>24 CP      | QIP68043.1              | 23,74               | 3e-13          | 62                        |
| <b>UrV5 RdRp</b>  | Totiviridae sp. RdRp                           | QDH87752.1              | 52,89               | 0              | 99                        |
|                   | Totiviridae sp. RdRp                           | QDH86837.1              | 54,85               | 0              | 92                        |
|                   | Totiviridae sp. RdRp                           | QDH87365.1              | 58,65               | 0              | 78                        |
|                   | Totiviridae sp. RdRp                           | QDH90454.1              | 57,79               | 0              | 74                        |
|                   | Totiviridae sp. RdRp                           | QDH91324.1              | 56,20               | 6e-142         | 57                        |
| <b>UrV6a CP</b>   | Totiviridae sp.<br>H4Bulk46262_000002 HP       | QDH90455.1              | 31,20               | 6e-129         | 99                        |
|                   | Totiviridae sp.<br>H1Rhizo26FD511_000002 HP    | QDH86838.1              | 37,21               | 2e-100         | 68                        |
|                   | Totiviridae sp.<br>H4Bulk46501_000002 HP       | QDH87366.1              | 31,03               | 5e-84          | 84                        |
|                   | Phytophthora condilina RNA<br>virus 2 CP       | QTT60992.1              | 26,06               | 3e-11          | 32                        |
|                   | Totiviridae sp.<br>H1BulkLitter51292_000002 HP | QDH87753.1              | 27,49               | 3e-11          | 41                        |
| <b>UrV6a RdRp</b> | Totiviridae sp. RdRp                           | QDH87752.1              | 60,11               | 0              | 96                        |
|                   | Totiviridae sp. RdRp                           | QDH86837.1              | 60,69               | 0              | 88                        |
|                   | Totiviridae sp. RdRp                           | QDH87365.1              | 59,24               | 0              | 77                        |
|                   | Totiviridae sp. RdRp                           | QDH90454.1              | 63,47               | 0              | 73                        |
|                   | Totiviridae sp. RdRp                           | QDH91324.1              | 55,33               | 9e-160         | 60                        |
| <b>UrV7 CP</b>    | Mucor hiemalis virus 4 CP                      | CAE9672667.1            | 46,23               | 0              | 98                        |
|                   | Trichoderma koningiopsis<br>totivirus 1 CP     | QGA70770.1              | 45,55               | 0              | 99                        |

| <b>Virus</b>          | <b>Virus name</b>                             | <b>Accession number</b> | <b>Identity (%)</b> | <b>E-Value</b> | <b>Query Coverage (%)</b> |
|-----------------------|-----------------------------------------------|-------------------------|---------------------|----------------|---------------------------|
|                       | Wuhan insect virus 26 HP1                     | YP_009342427.1          | 43,36               | 3e-150         | 78                        |
|                       | Wuhan insect virus 27 HP 1                    | YP_009342433.1          | 38,01               | 3e-149         | 95                        |
|                       | Totiviridae sp.<br>H4Bulk46889_000002 HP      | QDH88821.1              | 37,67               | 4e-149         | 96                        |
|                       | Umbelopsis ramanniana virus 4<br>RdRp         | VUD77425.1              | 86,26               | 0              | 100                       |
| <b>UrV7<br/>RdRp</b>  | Trichoderma koningiopsis<br>totivirus 1 RdRp  | QGA70771.1              | 60,48               | 0              | 91                        |
|                       | Wuhan insect virus 26 HP 2                    | YP_009342428.1          | 56,04               | 0              | 96                        |
|                       | Conidiobolus heterosporus<br>totivirus 1 RdRp | QUE40494.1              | 49,17               | 0              | 95                        |
|                       | Wuhan insect virus 27 HP 2                    | YP_009342434.1          | 48,78               | 0              | 95                        |
|                       | Trichoderma koningiopsis<br>totivirus 1 CP    | QGA70770.1              | 48,68               | 0              | 99                        |
| <b>UrV8a<br/>CP</b>   | Mucor hiemalis virus 4 CP                     | CAE9672667.1            | 47,88               | 0              | 99                        |
|                       | Wuhan insect virus 26 HP 1                    | YP_009342427.1          | 44,36               | 3e-166         | 78                        |
|                       | Wuhan insect virus 27 HP 1                    | YP_009342433.1          | 38,82               | 1e-153         | 98                        |
|                       | Totiviridae sp.<br>H4Bulk46889_000002 HP      | QDH88821.1              | 37,52               | 3e-153         | 96                        |
|                       | Umbelopsis ramanniana virus 4<br>RdRp         | VUD77425.1              | 65,26               | 0              | 96                        |
| <b>UrV8a<br/>RdRp</b> | Trichoderma koningiopsis<br>totivirus 1 RdRp  | QGA70771.1              | 62,18               | 0              | 91                        |
|                       | Wuhan insect virus 26 HP 2                    | YP_009342428.1          | 55,84               | 0              | 99                        |
|                       | Conidiobolus heterosporus<br>totivirus 1 RdRp | QUE40494.1              | 52,20               | 0              | 97                        |
|                       | Wuhan insect virus 27 HP 2                    | YP_009342434.1          | 50,90               | 0              | 96                        |
|                       | Totiviridae sp.<br>H4Bulk46262_000002 HP      | QDH90455.1              | 31,77               | 1e-130         | 99                        |
| <b>UrV6b<br/>CP</b>   | Totiviridae sp.<br>H1Rhizo26FD511_000002 HP   | QDH86838.1              | 35,68               | 7e-100         | 68                        |
|                       | Totiviridae sp.<br>H4Bulk46501_000002 HP      | QDH87366.1              | 30,95               | 5e-82          | 84                        |
|                       | Phytophthora condilina RNA<br>virus 2 CP      | QTT60992.1              | 24,52               | 4e-12          | 46                        |
|                       |                                               |                         |                     |                |                           |

| <b>Virus</b>      | <b>Virus name</b>                                 | <b>Accession number</b> | <b>Identity (%)</b> | <b>E-Value</b> | <b>Query Coverage (%)</b> |
|-------------------|---------------------------------------------------|-------------------------|---------------------|----------------|---------------------------|
|                   | Totiviridae sp.<br>H1BulkLitter51292_000002 HP    | QDH87753.1              | 24,15               | 6e-08          | 41                        |
| <b>UrV6b RdRp</b> | Totiviridae sp. RdRp                              | QDH87752.1              | 58,87               | 0              | 98                        |
|                   | Totiviridae sp. RdRp                              | QDH86837.1              | 59,33               | 0              | 91                        |
|                   | Totiviridae sp. RdRp                              | QDH90454.1              | 63,29               | 0              | 73                        |
|                   | Totiviridae sp. RdRp                              | QDH87365.1              | 58,89               | 0              | 77                        |
|                   | Totiviridae sp. RdRp                              | QDH91324.1              | 55,93               | 4e-159         | 59                        |
| <b>UgV1 CP</b>    | Plasmopara viticola lesion ass.<br>toti 3 CP      | QGY72631.1              | 42,13               | 0              | 97                        |
|                   | Plasmopara viticola lesion<br>ass.toti 4 CP       | QGY72633.1              | 39,53               | 2e-165         | 100                       |
|                   | Xanthophyllomyces<br>dendrorhous virus L1A CP     | YP_007697650.1          | 37,24               | 2e-155         | 100                       |
|                   | Rhodosporidiobolus odoratus<br>RNA virus 1 CP     | QPH36699.1              | 39,78               | 1e-154         | 95                        |
|                   | Red clover powdery mildew-<br>ass. totivirus 4 CP | BAT62483.1              | 37,23               | 2e-148         | 93                        |
| <b>UgV1 RdRp</b>  | Plasmopara viticola lesion ass.<br>toti 3 RdRp    | QGY72630.1              | 54,39               | 0              | 99                        |
|                   | Xanthophyllomyces<br>dendrorhous virus L1A RdRp   | YP_007697651.1          | 53,07               | 0              | 98                        |
|                   | Xanthophyllomyces<br>dendrorhous virus L2 RdRp    | AFH09416.2              | 53,07               | 0              | 98                        |
|                   | Xanthophyllomyces<br>dendrorhous virus L1B RdRp   | YP_009507835.1          | 51,13               | 0              | 98                        |
|                   | Erysiphe necator ass. totivirus 5<br>RdRp         | QJW70333.1              | 50,40               | 0              | 98                        |
| <b>UgV2 CP</b>    | Trichoderma koningiopsis<br>totivirus 1 CP        | QGA70770.1              | 48,46               | 0              | 98                        |
|                   | Mucor hiemalis virus 4 CP                         | CAE9672667.1            | 47,44               | 0              | 98                        |
|                   | Wuhan insect virus 26 HP 1                        | YP_009342427.1          | 50,45               | 0              | 80                        |
|                   | Totiviridae sp.<br>H4Bulk46889_000002 HP          | QDH88821.1              | 41,16               | 1e-177         | 97                        |
|                   | Conidiobolus heterosporus<br>totivirus 1 CP       | QUE40493.1              | 39,29               | 1e-160         | 97                        |
|                   | Wuhan insect virus 26 HP 2                        | YP_009342428.1          | 57,11               | 0              | 97                        |

| <b>Virus</b>      | <b>Virus name</b>                          | <b>Accession number</b> | <b>Identity (%)</b> | <b>E-Value</b> | <b>Query Coverage (%)</b> |
|-------------------|--------------------------------------------|-------------------------|---------------------|----------------|---------------------------|
| <b>UgV2 RdRp</b>  | Trichoderma koningiopsis totivirus 1 RdRp  | QGA70771.1              | 58,63               | 0              | 89                        |
|                   | Umbelopsis ramanniana virus 4 RdRp         | VUD77425.1              | 56,14               | 0              | 93                        |
|                   | Conidiobolus heterosporus totivirus 1 RdRp | QUE40494.1              | 52,33               | 0              | 95                        |
|                   | Wuhan insect virus 27 HP 2                 | YP_009342434.1          | 52,28               | 0              | 94                        |
| <b>UrV8b CP</b>   | Trichoderma koningiopsis totivirus 1 CP    | QGA70770.1              | 48,32               | 0              | 99                        |
|                   | Mucor hiemalis virus 4 CP                  | CAE9672667.1            | 47,73               | 0              | 99                        |
|                   | Wuhan insect virus 26 HP 1                 | YP_009342427.1          | 43,99               | 5e-164         | 78                        |
|                   | Wuhan insect virus 27 HP 1                 | YP_009342433.1          | 39,12               | 1e-156         | 98                        |
|                   | Totiviridae sp. H4Bulk46889_000002 HP      | QDH88821.1              | 37,99               | 1e-152         | 96                        |
| <b>UrV8b RdRp</b> | Umbelopsis ramanniana virus 4 RdRp         | VUD77425.1              | 64,37               | 0              | 96                        |
|                   | Trichoderma koningiopsis totivirus 1 RdRp  | QGA70771.1              | 61,64               | 0              | 91                        |
|                   | Wuhan insect virus 26 HP 2                 | YP_009342428.1          | 55,35               | 0              | 99                        |
|                   | Conidiobolus heterosporus totivirus 1 RdRp | QUE40494.1              | 51,57               | 0              | 97                        |
|                   | Wuhan insect virus 27 HP 2                 | YP_009342434.1          | 50,64               | 0              | 96                        |
| <b>UdV1a CP</b>   | Mucor hiemalis virus 4 CP                  | CAE9672667.1            | 45,76               | 0              | 99                        |
|                   | Trichoderma koningiopsis totivirus 1 CP    | QGA70770.1              | 43,75               | 0              | 99                        |
|                   | Wuhan insect virus 26 HP 1                 | YP_009342427.1          | 43,45               | 8e-154         | 80                        |
|                   | Totiviridae sp. H4Bulk46889_000002 HP      | QDH88821.1              | 38,36               | 5e-147         | 92                        |
|                   | Conidiobolus heterosporus totivirus 1 CP   | QUE40493.1              | 37,69               | 2e-142         | 99                        |
| <b>UdV1a RdRp</b> | Umbelopsis ramanniana virus 4 RdRp         | VUD77425.1              | 73,50               | 0              | 100                       |
|                   | Wuhan insect virus 26 HP 2                 | YP_009342428.1          | 54,04               | 0              | 100                       |
|                   | Trichoderma koningiopsis totivirus 1 RdRp  | QGA70771.1              | 57,14               | 0              | 95                        |

| <b>Virus</b>      | <b>Virus name</b>                          | <b>Accession number</b> | <b>Identity (%)</b> | <b>E-Value</b> | <b>Query Coverage (%)</b> |
|-------------------|--------------------------------------------|-------------------------|---------------------|----------------|---------------------------|
|                   | Conidiobolus heterosporus totivirus 1 RdRp | QUE40494.1              | 47,79               | 0              | 99                        |
|                   | Wuhan insect virus 27 HP 2                 | YP_009342434.1          | 46,81               | 0              | 99                        |
|                   | Trichoderma koningiopsis totivirus 1 CP    | QGA70770.1              | 49,56               | 0              | 99                        |
|                   | Mucor hiemalis virus 4 CP                  | CAE9672667.1            | 47,95               | 0              | 99                        |
| <b>UdV2 CP</b>    | Wuhan insect virus 26 HP 1                 | YP_009342427.1          | 44,63               | 1e-163         | 78                        |
|                   | Totiviridae sp.<br>H4Bulk46889_000002 HP   | QDH88821.1              | 36,84               | 8e-149         | 96                        |
|                   | Wuhan insect virus 27 HP 1                 | YP_009342433.1          | 36,91               | 8e-146         | 95                        |
|                   | Umbelopsis ramanniana virus 4 RdRp         | VUD77425.1              | 66,88               | 0              | 98                        |
|                   | Wuhan insect virus 26 HP 2                 | YP_009342428.1          | 56,96               | 0              | 99                        |
| <b>UdV2 RdRp</b>  | Trichoderma koningiopsis totivirus 1 RdRp  | QGA70771.1              | 61,24               | 0              | 93                        |
|                   | Conidiobolus heterosporus totivirus 1 RdRp | QUE40494.1              | 53,95               | 0              | 99                        |
|                   | Wuhan insect virus 27 HP 2                 | YP_009342434.1          | 50,38               | 0              | 99                        |
|                   | Mucor hiemalis virus 4 CP                  | CAE9672667.1            | 46,12               | 0              | 98                        |
|                   | Trichoderma koningiopsis totivirus 1 CP    | QGA70770.1              | 44,67               | 0              | 99                        |
| <b>UdV1b CP</b>   | Wuhan insect virus 26 HP 1                 | YP_009342427.1          | 43,62               | 2e-159         | 80                        |
|                   | Totiviridae sp.<br>H4Bulk46889_000002 HP   | QDH88821.1              | 37,44               | 1e-147         | 93                        |
|                   | Conidiobolus heterosporus totivirus 1 CP   | QUE40493.1              | 37,93               | 2e-143         | 93                        |
|                   | RdRp Umbelopsis ramanniana virus 4         | VUD77425.1              | 74,66               | 0              | 98                        |
|                   | RdRp Trichoderma koningiopsis totivirus 1  | QGA70771.1              | 60,35               | 0              | 89                        |
| <b>UdV1b RdRp</b> | Wuhan insect virus 26 HP 2                 | YP_009342428.1          | 54,68               | 0              | 97                        |
|                   | RdRp Conidiobolus heterosporus totivirus 1 | QUE40494.1              | 49,42               | 0              | 94                        |
|                   | Wuhan insect virus 27 HP 2                 | YP_009342434.1          | 48,57               | 0              | 97                        |
