# Supplementary material for: Molecular Characterization of Novel Mycoviruses in Seven Umbelopsis Strains
Source: MDPI journal article supplement (doi:10.3390/v14112343), 2022-10-25
Supplement: s1 [file s1]

**Table S2. melléklet:** List of primers applying for amplification of cDNAs and hybridization probes.

| Primer*                 | Sequence (5' - 3')                    | Application                                                            | Reference     |
|-------------------------|---------------------------------------|------------------------------------------------------------------------|---------------|
|                         | p- GGATCCCGGAATTCGGTAATACG            |                                                                        |               |
| PC3-T7 loop             | ACTCACTATATTTTATAGTGAGTCGTATTA-<br>OH | self-priming anchor primer for cDNA synthesis                          | [8]           |
| PC2                     | p-CCGAATTCCTCGGGATCC                  | Amplification of cDNA                                                  | [8]           |
| <i>U. angularis</i> _2F | CGTTATATTGCTCATCGTCTTAGG              | Specific amplification of 4.0-kbp fragment<br>from <i>U. angularis</i> | In this study |
| <i>U. angularis</i> _2R | ACTGAAACTAGAAATCGGTAGG                |                                                                        |               |
| UrV5_CP_F               | CTGGCTGGAGTGAATAACTTGG                | Amplification of probe for UrV5 CP                                     | In this study |
| UrV5_CP_R               | GTCATCAAATTGAGATGCACAG                |                                                                        |               |
| UrV5_RdRp_F             | CCGTGGGTCTACAAAGCCTG                  | Amplification of probe for UrV5 RdRp                                   | In this study |
| UrV5_RdRp_R             | CGTATTCCTATGCCCTGACC                  |                                                                        |               |
| UrV6a_CP_F              | ACTGCTTACTCCGGGTTC                    | Amplification of probe for UrV6a CP                                    | In this study |
| UrV6a_CP_R              | GCCCTAACTTGTTCAAAGTAACTG              |                                                                        |               |
| UrV6a_RdRp_F            | CAAATGCGTCCCATCAAGCC                  | Amplification of probe for UrV6a RdRp                                  | In this study |
| UrV6a_RdRp_R            | GCCAATGCCTTCTCCTTTGC                  |                                                                        |               |
| UrV6b_CP_F              | ATTCTGTGCGTATGTTCTGG                  | Amplification of probe for UrV6b CP                                    | In this study |
| UrV6b_CP_R              | GAGAGTATGCGGAAGTGCCT                  |                                                                        |               |
| UrV6b_RdRp_F            | AACGAAGGAGGGAGGTATGG                  | Amplification of probe for UrV6b RdRp                                  | In this study |
| UrV6b_RdRp_R            | GGTTATGAAAGGCTCCAAGTAGG               |                                                                        |               |
| UrV7_CP_F               | TACATCCTCTAGACTCCACAATGC              | Amplification of probe for UrV7 CP                                     | In this study |

| Primer*      | Sequence (5' - 3')       | Application                           | Reference     |
|--------------|--------------------------|---------------------------------------|---------------|
| UrV7_CP_R    | CATTGGAGCATCAGTAATCAC    | Amplification of probe for UrV7 RdRp  | In this study |
| UrV7_RdRp_F  | TCACCCAGACACAGTAAATATAGC |                                       |               |
| UrV7_RdRp_R  | TACCGACAGGGAACCTCATTAGG  |                                       |               |
| UrV8a_CP_F   | ATTTACCTGCCGACTACTCTG    | Amplification of probe for UrV8a CP   | In this study |
| UrV8a_CP_R   | AAACGGTCCTCCATTTCAGTTCG  |                                       |               |
| UrV8a_RdRp_F | TCAAAGATTTACCTAAGCAACGGG |                                       |               |
| UrV8a_RdRp_R | GGCCTAGCCTTATTGCCTACAG   | Amplification of probe for UrV8a RdRp | In this study |
| UrV8b_CP_F   | TGACACTAGTAGAATGGAAAGCAC |                                       |               |
| UrV8b_CP_R   | TGCAGCCCAAGTTTGGTACTC    |                                       |               |
| UrV8b_RdRp_F | TAGACGGTGAAGAAAGGATTAAGG | Amplification of probe for UrV8b RdRp | In this study |
| UrV8b_RdRp_R | AATTTCCTTGGGTCTCACGA     |                                       |               |
| UgV1_CP_F    | TTCCAGCCTTTGCCATCTTACC   |                                       |               |
| UgV1_CP_R    | GCGTTGACACTCCGTACTACTG   | Amplification of probe for UgV1 CP    | In this study |
| UgV1_RdRp_F  | TGGGCTAATGCTGTGGTTCG     |                                       |               |
| UgV1_RdRp_R  | GCTGCCTTGAACAATTTGATCG   |                                       |               |
| UgV2_CP_F    | ACCACCGCTACGAGATTGAG     | Amplification of probe for UgV2 CP    | In this study |
| UgV2_CP_R    | AGAGAACCTGGCTAATACTATGCT |                                       |               |
| UgV2_RdRp_F  | GACGCATACCTTGAAGCATACC   |                                       |               |
| UgV2_RdRp_R  | AGCCTGATATTCATCTTCTTAGCG | Amplification of probe for UgV2 RdRp  | In this study |
| UdV1a_CP_F   | TCGCTCTTGATGATATTGATTGGC |                                       |               |
| UdV1a_CP_R   | TTCCGGTTGCGACACTTATACAC  |                                       |               |

| Primer*      | Sequence (5' - 3')       | Application                           | Reference     |
|--------------|--------------------------|---------------------------------------|---------------|
| UdV1a_RdRp_F | TGGGTGGTGTGATGTTATGG     | Amplification of probe for UdV1a RdRp | In this study |
| UdV1a_RdRp_R | ATATCTTGATGGTACTGGCTATGC |                                       |               |
| UdV2_CP_F    | ATGTATAGTGATGATTCGGGAACC | Amplification of probe for UdV2 CP    | In this study |
| UdV2_CP_R    | TGACGTAATCAACAATCCAAGACC |                                       |               |
| UdV2_RdRp_F  | TGCGAAGATGTATTACCAAACGAG | Amplification of probe for UdV2 RdRp  | In this study |
| UdV2_RdRp_R  | GTGACCCTTGTAGCAGTAGTTGTG |                                       |               |
| UdV1b_CP_F   | TTTACCAACAAGAGCCAGAG     | Amplification of probe for UdV1b CP   | In this study |
| UdV1b_CP_R   | ATCGTAAGCGTCTGTGAAAGTACC |                                       |               |
| UdV1b_RdRp_F | TTTACGGCACAGGAAGTATGG    | Amplification of probe for UdV1b RdRp | In this study |
| UdV1b_RdRp_R | AGTCAACCTGCCCAACATCC     |                                       |               |

\*F and R indicating forward and reverse primers, respectively.
