# Supplementary material for: Molecular Characterization of Novel Mycoviruses in Seven Umbelopsis Strains
Source: MDPI journal article supplement (doi:10.3390/v14112343), 2022-10-25
Supplement: s1 [file s1]

**Supplementary Table S1** *Umbelopsis* strains investigated in this study.

| Species name                      | Collection number | SZMC code | Substrate/Origin             | Presence of dsRNAs | References | Accession number of ITS sequence | Accession number of MCM7 sequence |
|-----------------------------------|-------------------|-----------|------------------------------|--------------------|------------|----------------------------------|-----------------------------------|
| <i>Mucor lusitanicus</i> *        | CBS 277.47        | -         | -                            | -                  | -          | -                                | MF495132.1                        |
| <i>Umbelopsis angularis</i>       | CBS 603.68        | 11252     | Soil / Baarn, Netherlands    | +                  | [5]        | MH859191.1                       | MF417301.1                        |
| <i>Umbelopsis autotrophica</i>    | CBS 310.93        | 11276     | Soil / UK                    | -                  | [5]        | HQ630285                         | -                                 |
| <i>Umbelopsis changbaiensis</i> * | CGMCC 3.16317     | -         | -                            | -                  | -          | -                                | MF417319.1                        |
| <i>Umbelopsis dimorpha</i>        | CBS 110039        | 22797     | Soil / New Zealand           | +                  | [5]        | AJ580917                         | MF417365.1                        |
| <i>Umbelopsis fusiformis</i> *    | CBS 385.85        | -         | -                            | -                  | -          | KC489500.1                       | MF417359.1                        |
| <i>Umbelopsis gibberispora</i>    | CBS 109328        | 23390     | <i>Fagus crenata</i> / Japan | +                  | [5]        | AJ495442                         | MF417364.1                        |
| <i>Umbelopsis isabellina</i>      | FSU 909           | 11324     | -                            | -                  | [5]        | -                                | -                                 |
| <i>Umbelopsis isabellina</i>      | FSU 910           | 11323     | -                            | -                  | [5]        | HQ630335                         | -                                 |
| <i>Umbelopsis isabellina</i>      | FSU 922           | 11335     | -                            | -                  | [5]        | -                                | -                                 |
| <i>Umbelopsis isabellina</i>      | FSU 923           | 11319     | -                            | -                  | [5]        | -                                | -                                 |
| <i>Umbelopsis isabellina</i>      | FSU 924           | 11325     | -                            | -                  | [5]        | -                                | -                                 |
| <i>Umbelopsis isabellina</i>      | FSU 925           | 11290     | -                            | -                  | [5]        | -                                | -                                 |
| <i>Umbelopsis isabellina</i>      | FSU 926           | 11291     | -                            | -                  | [5]        | -                                | -                                 |
| <i>Umbelopsis isabellina</i>      | FSU 954           | 11322     | -                            | -                  | [5]        | -                                | -                                 |
| <i>Umbelopsis isabellina</i>      | FSU 1716          | 11292     | -                            | -                  | [5]        | -                                | -                                 |
| <i>Umbelopsis isabellina</i>      | FSU 2831          | 11293     | -                            | -                  | [5]        | -                                | -                                 |
| <i>Umbelopsis isabellina</i>      | FSU 2892          | 11321     | -                            | -                  | [5]        | -                                | -                                 |

|                               |            |       |                                                            |   |               |                      |            |
|-------------------------------|------------|-------|------------------------------------------------------------|---|---------------|----------------------|------------|
| <i>Umbelopsis isabellina</i>  | NRRL 1757  | 11076 | Soil / Wisconsin, USA                                      | - | [5]           | HQ630284             | -          |
| <i>Umbelopsis longicollis</i> | CBS 209.32 | 11208 | Sandy loam / Victoria, Australia                           | - | [5]           | HQ630287             | MF417368.1 |
| <i>Umbelopsis ovata</i>       | CBS 499.82 | 22674 | <i>Isopogon ceratophyllus</i> / Victoria, Australia        | - | [5]           | AJ495429             | MF417361.1 |
| <i>Umbelopsis ramanniana</i>  | NRRL 1296  | 11078 | - / Wisconsin, USA                                         | + | [5]           | HQ630289             | -          |
| <i>Umbelopsis ramanniana</i>  | CBS 243.58 | 27285 | Man, skin between toes / Netherlands                       | + | In this study | -                    | -          |
| <i>Umbelopsis ramanniana</i>  | CBS 478.63 | 27286 | <i>Amanita sp.</i> / Netherlands                           | + | In this study | -                    | -          |
| <i>Umbelopsis ramanniana</i>  | CBS 101226 | 27287 | Soil, wood scraps / California                             | - | In this study | JN206383.1           | -          |
| <i>Umbelopsis ramanniana</i>  | CBS 110437 | 27288 | Soil / Netherlands                                         | - | In this study | -                    | -          |
| <i>Umbelopsis ramanniana</i>  | CBS 113564 | 27289 | Dead isopod under bark of <i>Salix</i> / Netherlands       | - | In this study | -                    | -          |
| <i>Umbelopsis ramanniana</i>  | CBS 219.47 | 27290 | <i>Lactarium deliciosus</i> / Netherlands                  | - | In this study | MF417293.1           | -          |
| <i>Umbelopsis swartii</i>     | CBS 868.85 | 23388 | Soil under <i>Eucalyptus regnans</i> / Victoria, Australia | - | [5]           | AJ495444, MH861920.1 | MF417363.1 |
| <i>Umbelopsis versiformis</i> | CBS 150.81 | 23387 | Root ( <i>Quercus borealis</i> ) / Virginia                | - | [5]           | AJ495434, MH861311.1 | -          |
| <i>Umbelopsis versiformis</i> | CBS 473.74 | 21866 | Poor quality soil / Victoria, Australia                    | + | [5]           | AJ495433             | MF417360.1 |
| <i>Umbelopsis vinacea</i>     | CBS 222.29 | 11234 | - / USSR                                                   | - | [5]           | HQ630286.1           | -          |
| <i>Umbelopsis vinacea*</i>    | CBS 212.32 | -     | -                                                          | - | -             | MH855292.1           | MF417356.1 |

|                            |            |       |   |   |     |            |            |
|----------------------------|------------|-------|---|---|-----|------------|------------|
| <i>Umbelopsis vinacea</i>  | FSU 2701   | 11316 | - | - | [5] | HQ630335   | -          |
| <i>Umbelopsis westae</i> * | CBS 870.85 | -     | - | - | -   | MH861922.1 | MF417366.1 |

SZMC: Szeged Microbiology Collection, Hungary; CBS: Centraalbureau voor Schimmelcultures, Baarn, The Netherlands; NRRL: Agricultural Research Service Culture Collection, USA; FSU: *Friedrich Schiller University, Jena, Germany*.

\*These strains were used only for the construction of the phylogeny of the *Umbelopsis* species inferred from the ITS and MCM7 sequences.
